# Supplementary material
Source: PubMed Central journal article supplement (PMC5771829)

Figure, Supplemental Digital Content 1: Final model structure for presence of hot flashes, based on (A) perimenopausal women only at baseline, (B) all women in year 4, and (C) perimenopausal women only in year 4 in a cohort study of midlife women in the Baltimore area. Rectangles indicate categorical variables, while ovals indicate continuous variables and hexagons indicate ordinal variables.

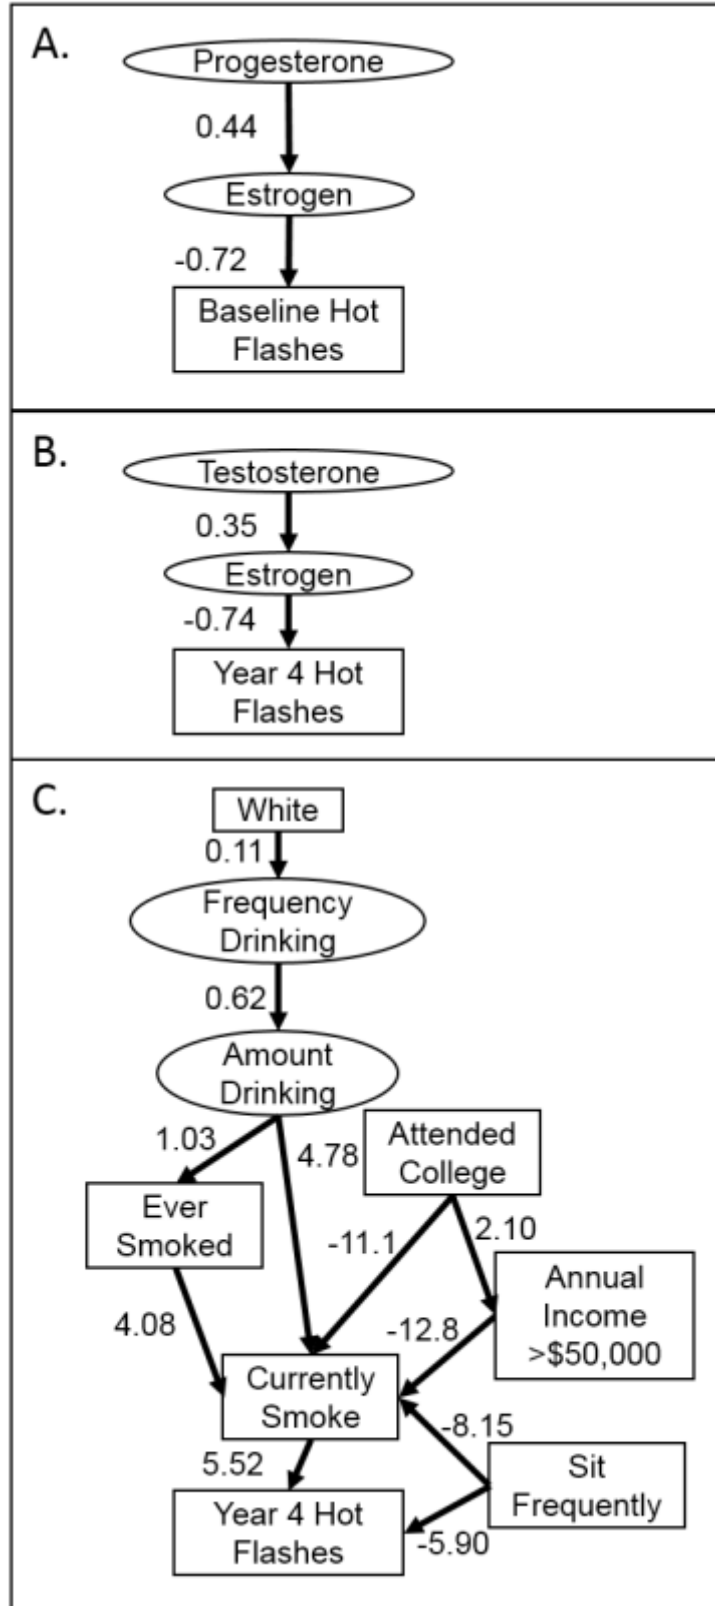

Supplement: NIHMS889426-supplement-Supplemental_Data_File___doc___tif__pdf__etc___1.pdf [file NIHMS889426-supplement-Supplemental_Data_File___doc___tif__pdf__etc___1.pdf]
