# Supplementary material
Source: PubMed Central journal article supplement (PMC5771829)

Figure, Supplemental Digital Content 2: Final model structure for moderate to severe hot flashes, based on (A) perimenopausal women only at baseline, and (B) perimenopausal women only in year 4 in a cohort study of midlife women in the Baltimore area. Rectangles indicate categorical variables, while ovals indicate continuous variables and hexagons indicate ordinal variables.

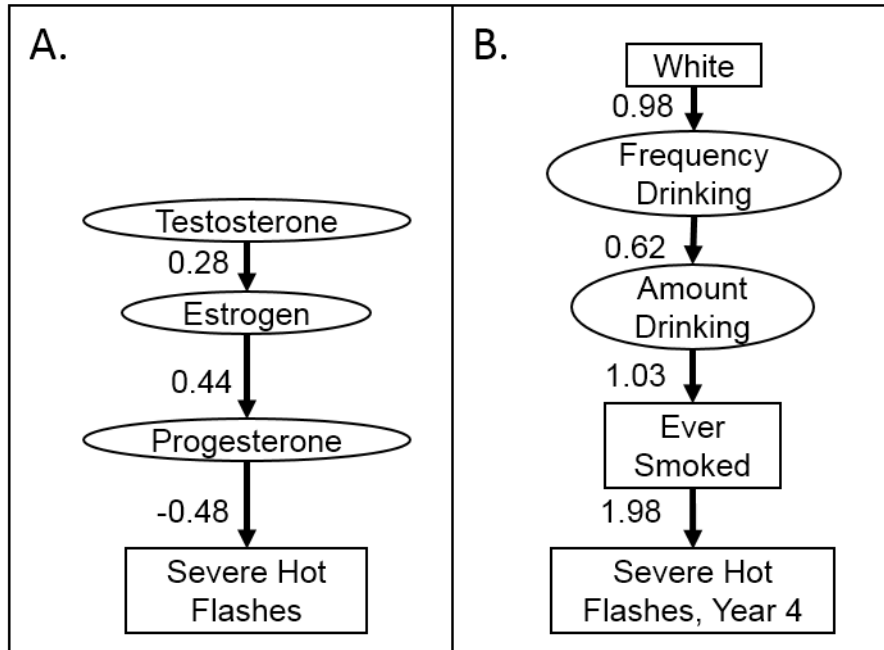

Supplement: NIHMS889426-supplement-Supplemental_Data_File___doc___tif__pdf__etc___2.pdf [file NIHMS889426-supplement-Supplemental_Data_File___doc___tif__pdf__etc___2.pdf]
