# Supplementary material
Source: PubMed Central journal article supplement (PMC5771829)

Figure, Supplemental Digital Content 3: Final model structure for all outcomes at baseline, based on perimenopausal women only in a cohort study of midlife women in the Baltimore area. Variables in bold were outcomes. Rectangles indicate categorical variables, while ovals indicate continuous variables and hexagons indicate ordinal variables.

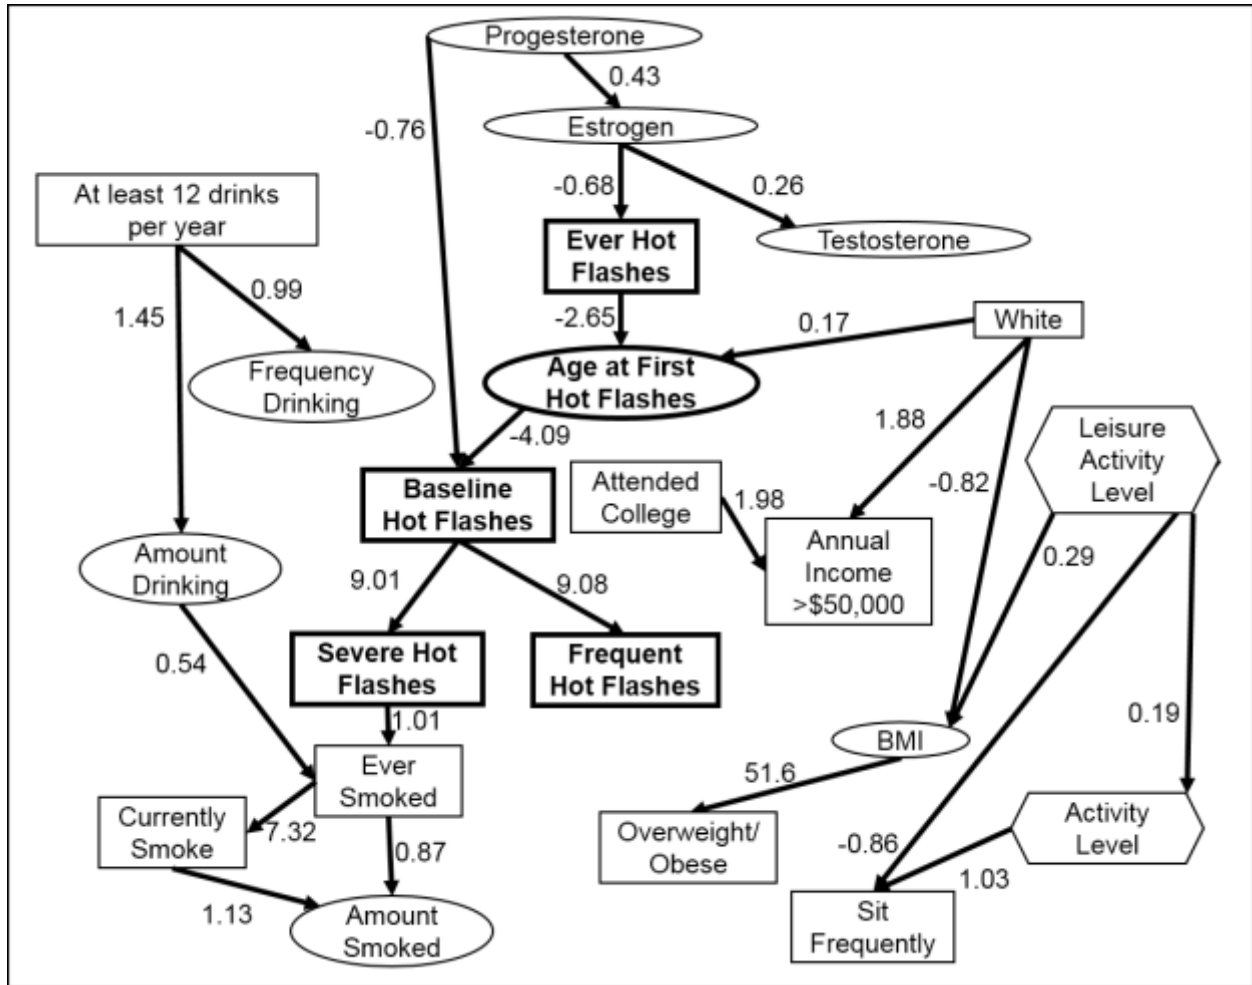

Supplement: NIHMS889426-supplement-Supplemental_Data_File___doc___tif__pdf__etc___3.pdf [file NIHMS889426-supplement-Supplemental_Data_File___doc___tif__pdf__etc___3.pdf]
